# Supplementary material for: Equifinality Contaminates the Sensitivity Analysis of Process-Based Snow Models
Source: Copernicus journal article supplement (doi:10.5194/egusphere-2023-3049), 2024-03-05
Supplement: Supplementary file [file egusphere-2023-3049-AC1-supplement.pdf]

## RC2: Francesca Pianosi

The paper presents a sensitivity analysis of a process-based snow model looking at how different choices of model parameter values and/or equations to represent snow processes impact snow depth simulations and accuracy with respect to observations available at a site in southwestern Idaho.

Overall, the manuscript is well written though some key aspects of the methodology applied need to be clarified (see point 2 and 3 below). Also, the contribution of the manuscript needs to be better articulated (point 1). I am not an expert of snow process modelling but, as an expert in sensitivity analysis of hydrological models more broadly, I do not find the key finding of the manuscript particularly novel or unexpected, so I think the authors should better articulate the specific contribution of their study and how it will help and inform other process-based snow modellers.

Thank you very much for your thorough review and insightful comments on our manuscript titled “Equifinality Contaminates the Sensitivity Analysis of Process-Based Snow Models.” We appreciate your positive feedback on the organization and writing of our article, and we are grateful for your suggestions to improve our manuscript. Below, we address your general comments and minor suggestions in detail. Please find our response in **Blue** color.

### 1) TITLE AND CONTRIBUTION

Starting from the title, the authors highlight as key contribution of their work that sensitivity analysis results “are contaminated” by equifinality, however it is not totally clear to me what this “contamination” means and what its implications are.

**Response:** Thanks for the comment. The title will be updated to better reflect the paper’s objective and contribution as has been discussed in response to the following comment.

On L. 356 they say:

“the sensitivity of performance metrics to perturbations in model parameters is contaminated by equifinality. We illustrate some cases in this paper where parameter perturbations lead to similar performance metrics for quite different snow depth time series. Given that many published parameter sensitivity studies are based on the sensitivity of performance metrics to model parameters, the conclusions from many model sensitivity analysis studies may not be trustworthy.”

Now the fact that different parameter combinations lead to different simulated time series all associated with similar value of performance metric is not surprising - this is the very definition of equifinality. As for SA, even if a performance metric exhibits small variability, it can be subject to sensitivity analysis: in fact, as shown in Figure 5, also in this work it was possible to clearly estimate the relative importance of parameters in determining the (small) variability of the 3 performance metrics (RMSLE, KGE, NSE). The Figure shows that these sensitivities are a bit different – for example thermal conductivity has low sensitivity index for RMSLE and much higher for KGE, NSE – but again this is not surprising, as we know from SA literature that different metrics are sensitive to different parameters (e.g. see review in:

<https://doi.org/10.1016/j.earscirev.2019.04.006>) which is also why it is good practice to use a range of metrics for model calibration and evaluation.

To be honest, in this case these differences do not look too dramatic either: while the parameter ranking is not exactly the same across the four panels in Figure 5, the screening results is not significantly changed (the first six parameters are important while the other six are uninfluential) and is also consistent with conclusion from visual inspection of simulated time series in Figure 3. So, I think the authors need to better articulate what they mean by the statement that “equifinality contaminates sensitivity analysis” and in what way “the conclusions from many model sensitivity analysis studies may not be trustworthy”. Maybe some specific examples from the snow modelling literature and previous SA applications to snow models would help to make the case of what are the new lessons learnt here.

**Response:** This is a very constructive comment. We believe that to properly address this comment, it needs to be seen together with comment #3. Accordingly, we will distinguish between the “Performance Metrics” (i.e., RMSLE, KGE, NSE) and the “Signature Metric” (i.e., Mean). A signature metric being a quantitative measure that captures key characteristics or patterns of a hydrological time series (McMillan 2020), which essentially can represent the “Model Behavior”. Accordingly, the methodology and discussion sections will be improved to articulate as to how the performance metrics mask the model sensitivity to different parameters due to equifinality. In contrast, signature metrics, such as Mean, can describe one of the system behaviors with more fidelity as shown through the consistency between the model simulations and observations.

Further references to previous SA applications to snow models will also be provided to back up this discussion. Additionally, the sentence within which we mention “the conclusions from many model sensitivity analysis studies may not be trustworthy” will be modified to be less subjective.

## 2) MODEL AND EXPERIMENTAL SET-UP

The set-up of the sensitivity analysis and of the model itself needs to be clarified.

On line 143 the authors say that they will assess “the selection of parameterizations (i.e., equations used to parameterize specific processes), the selection of model parameters used in the parameterizations (i.e., the model equations), and the model discretization configurations”. However, the “discretization configurations” are not mentioned or reported ever again, and the “selection of parameterizations” is only applied to two processes (atmospheric stability and albedo) out of five modelled (see Table 1). So, this suggests to me that this is mostly a “conventional” sensitivity analysis of model parameters, with the additional assessment of different parameterisations for some of the modelled processes. If so, this needs to be clarified throughout the manuscript.

**Response:** This section will be modified to clarify that there are only two parametrizations for which sensitivity analysis has been conducted.

Also, on L. 89 the authors say “This study simulates snow processes for the period November 2005 to June 2006. This choice was made to reduce the computational effort required for modelling and analysis”.

The sentence suggests the model has long run time, but it is not clear to me where this complexity comes from if the model only simulate vertical fluxes – as suggested by Fig. 2 – at one location (the Aspen site). Or maybe the model does simulate the snow depth over the entire spatial domain, but then if so, how relevant it is to look at simulations (and their sensitivity) in one location only? This needs clarification.

**Response:** This is a valid question. We indeed simulated snow depth at the Aspen site over a defined spatial domain. Although the model runtime to generate the simulation results is not computationally intensive, conducting sensitivity analyses over the online PySUMMA platform requires a great deal of computational effort. To clarify, we used 20 trajectories ( $r$ ) for each parameter ( $k$ ), resulting in the number of simulations per parameter being  $r(k+1) = 20(1+1) = 40$ . With 12 parameters in total, this amounted to  $40 * 12 = 480$  simulations. To manage computational time effectively while covering a full snow season, we selected the period from November 2005 (before snowfall) to June 2006 (complete snow melt). We will update the methodology section to add this clarifying detail.

### 3) PERFORMANCE METRICS

In Table 2 and throughout the manuscript, the authors use the term “performance metric” to refer to all metrics, including the Mean (i.e. the average snow depth). However, differently from NSE, KGE and RMSLE, this statistic has nothing to do with the model performance (unless the Mean of simulated snow depth is compared to the mean of observations, which however does not seem to be the case from the equation in the last row of Table 2). This difference needs to be clarified. I’d suggest to use the term “performance metric” for NSE, KGE and RMSLE, and “output metric” for the Mean (this is often used in the Sensitivity Analysis literature for model outputs subject to SA which are based only on model simulations only).

**Response:** This is a good suggestion. Please refer to our response to comment #1.

The point should also be clarified in the results section.

On L. 247-248, the sentence “Overall, the performance results show a high degree of consistency between the simulated and observed snow depth data based on mean metric” is unclear. The consistency between simulated and observed data can be shown by the KGE, NSE and RMSLE metrics, but not the Mean metric. So, how did the authors get to that conclusion?

**Response:** We will rewrite this sentence to better reflect the objective of this paper which is the fact that performance metrics obscure the model behavior due to equifinality.

Similarly, on L. 270: “in cases where there is a discernible pattern in each parameter, it becomes possible to identify the optimum value that can lead to the highest level of agreement between the simulation and observation. For instance, the simulation of snow depth will improve for the values of the exponent for meltwater flow greater than 2” Again, how one can infer the level of agreement between the simulation and observation based on Figure 4, given it shows the (observations-free) mean of the simulated snow depth?

**Response:** I agree with the reviewer that using the metric "Mean" here does not accurately reflect the level of agreement between simulations and observations. We will thoroughly review our manuscript and remove the relevant descriptions. This change will not affect our conclusion regarding equifinality.

Given this comment, as we replied earlier, we will use two different terms in our revised manuscript: performance metric and behavior metric. The former compares simulations with observations, while the latter describes one of the system behaviors (without comparing to observations). Depending on the purpose of conducting sensitivity analysis, the adoption of these metrics can vary. If the goal is performance metrics-based model calibration (e.g., KGE, NSE, RMSLE), then performance metrics are appropriate. However, if the goal is to understand the sensitivity of system behavior (e.g., mean snow depth) or behavior metrics-based model calibration, then behavior metrics should be used.

Last, on L. 178 the authors mention “flow simulation results” but I believe the metrics used here are calculated on snow depth simulations results, not flows. Or are NSE, KGE and RMSLE computed over flow simulations? (but then if so, what flow observations are being used? And what about the other processes and parameters that determine the streamflow at gauging station?). This really needs to be clarified.

**Response:** That is correct. We actually meant “snow depth simulation results”. This typo will be modified in the revised manuscript.

## MINOR

L. 26 “that sensitivity analysis of snow modelling parameters plays a crucial role in understanding their impact on decision outcomes”. This sentence is unclear (what “decision outcomes”?) please rephrase

**Response:** This will be rephrased.

L. 46 “interdisciplinary challenge” I would not say that “process-based hydrological modelling” is a particularly interdisciplinary work!

**Response:** Absolutely. This will be rephrased.

L. 53 “and different model parameters” suggest replacing “parameters” by “parameter values”

**Response:** The words “Parameters” and “Parametrizations” are used to reflect the difference between variables and equations, respectively. We will replace parameters by parameter values.

Figure 2 is unnecessarily large, consider reducing it. Also, using a consistent wording between this Figure and the first column of Table 1 would improve clarify (for example, I suppose “(partitioning)” in Fig. 2

refers to “Precipitation flux” in Table 1, “(Drainage parameterization” corresponds to “Liquid water in snowpack flux”, etc.)

**Response:** Sure. The wording on the plot will be revised to match Table 1 in the revised version.

L. 179 “altering a parameter influences the outcome of a decision”. Unclear, please rephrase.

**Response:** This will be rephrased.

Figure 4: units of measurements missing on vertical axis label

**Response:** The Unit (meter) will be added to the figure in the revised version.

L. 282: “The variance in the ranking of parameters’ accuracy prediction by different performance metrics”. This sentence does not make much sense, please revise.

**Response:** This will be rephrased.

L. 286: “is shown in Figure 6” should be “Figure 5” (I guess)

**Response:** This will be corrected in revised version.

L. 309: “the differences between the simulations with lowest thermal conductivity (blue line) have differences with the observations that are...” Convoluted/confusing sentence, please clarify.

**Response:** This will be rephrased.

Thank you once again for your valuable feedback. We believe our revisions will have significantly improve the clarity and robustness of our study. Please do not hesitate to contact us if you have any further questions or suggestions.

#### **References:**

McMillan HK. A review of hydrologic signatures and their applications. WIREs Water. 2021; 8:e1499. <https://doi.org/10.1002/wat2.1499>

Sincerely,

Tek Kshetri, Amir Khatibi, Yiwen Mok, Shahabul Alam, Hongli Liu, and Martyn P. Clark
